# Supplementary material
Source: PubMed Central journal article supplement (PMC4931749)
Supplement: Supp_Table1.pdf [file Supp_Table1.pdf]

## Supplementary Data

SUPPLEMENTARY TABLE S1. ACTG A5269 BASELINE  
GENE EXPRESSION BY TREATMENT RESPONSE

*Median gene expression by treatment response*

| <i>Gene</i>    | <i>SVR</i> | <i>NR</i> | <i>p*</i> |
|----------------|------------|-----------|-----------|
| <i>IFIT2</i>   | 0.021      | 0.012     | 0.121     |
| <i>STAT1</i>   | 0.345      | 0.286     | 0.251     |
| <i>IFIT3</i>   | 0.019      | 0.013     | 0.258     |
| <i>ISG15</i>   | 0.046      | 0.030     | 0.282     |
| <i>OAS1</i>    | 0.034      | 0.025     | 0.290     |
| <i>OASL</i>    | 0.023      | 0.015     | 0.290     |
| <i>IFIT1</i>   | 0.023      | 0.010     | 0.299     |
| <i>TRIM5</i>   | 0.021      | 0.018     | 0.307     |
| <i>IFITM3</i>  | 0.177      | 0.198     | 0.343     |
| <i>IFNA2</i>   | 0.004      | 0.003     | 0.371     |
| <i>IFI27</i>   | 0.003      | 0.001     | 0.395     |
| <i>PLSCR1</i>  | 0.009      | 0.010     | 0.499     |
| <i>LY6E</i>    | 0.193      | 0.176     | 0.510     |
| <i>RARRES3</i> | 0.132      | 0.114     | 0.522     |
| <i>STAT2</i>   | 0.092      | 0.087     | 0.595     |
| <i>IRF9</i>    | 0.042      | 0.038     | 0.620     |
| <i>IFITM2</i>  | 0.416      | 0.400     | 0.672     |
| <i>IRF1</i>    | 0.559      | 0.552     | 0.698     |
| <i>OAS2</i>    | 0.144      | 0.129     | 0.739     |
| <i>IFNB1</i>   | 0.001      | 0.001     | 0.766     |
| <i>STAT6</i>   | 0.322      | 0.317     | 0.790     |
| <i>TRIM14</i>  | 0.052      | 0.042     | 0.861     |
| <i>MX1</i>     | 0.050      | 0.061     | 0.907     |
| <i>MX2</i>     | 0.127      | 0.141     | 0.921     |
| <i>IRF7</i>    | 0.106      | 0.114     | 0.935     |
| <i>IFI44</i>   | 0.029      | 0.028     | 0.950     |
| <i>SP110</i>   | 0.080      | 0.076     | 0.964     |
| <i>TYK2</i>    | 0.067      | 0.063     | 1.000     |

All genes analyzed were similarly expressed between SVR and NR before initiation of therapy. The primers are all commercially available and were obtained from Applied Biosystems ([www.thermofisher.com/us/en/home/brands/applied-biosystems.html](http://www.thermofisher.com/us/en/home/brands/applied-biosystems.html)) and will be made available upon request.

None met the predetermined FDR at 10% using the Benjamini-Hochberg procedure.

\*Exact Wilcoxon test.

FDR, false discovery rate; NR, nonresponder; SVR, sustained virologic response.
