# Supplementary material
Source: PubMed Central journal article supplement (PMC4931749)
Supplement: Supp_Table2.pdf [file Supp_Table2.pdf]

SUPPLEMENTARY TABLE S2. A5269 GENE EXPRESSION BASELINE, AFTER 4 WEEKS OF NITAZOXANIDE PRETREATMENT; AFTER WEEK 4 INTERFERON, WEEK 8 NITAZOXANIDE

| Gene          | Median baseline<br>gene expression |       |              | Median week 4<br>change from baseline |       |              | Median week 8<br>change from baseline |       |       |
|---------------|------------------------------------|-------|--------------|---------------------------------------|-------|--------------|---------------------------------------|-------|-------|
|               | $2^{(-\Delta Ct)}$                 |       |              | $2^{(-\Delta\Delta Ct)}$              |       |              | $2^{(-\Delta\Delta Ct)}$              |       |       |
|               | SVR                                | NR    | p            | SVR                                   | NR    | p            | SVR                                   | NR    | p     |
| <i>IFI44</i>  | 0.033                              | 0.023 | 0.393        | 0.747                                 | 1.747 | <b>0.023</b> | 7.875                                 | 9.648 | 0.436 |
| <i>IFIT2</i>  | 0.030                              | 0.015 | <b>0.023</b> | 0.454                                 | 1.610 | <b>0.005</b> | 2.717                                 | 3.407 | 0.393 |
| <i>IFIT3</i>  | 0.021                              | 0.012 | 0.063        | 0.919                                 | 1.449 | 0.390        | 6.598                                 | 5.926 | 0.912 |
| <i>IRF9</i>   | 0.042                              | 0.030 | 0.089        | 0.945                                 | 1.437 | 0.393        | 1.311                                 | 1.735 | 0.123 |
| <i>OAS1</i>   | 0.042                              | 0.021 | <b>0.043</b> | 0.875                                 | 1.427 | 0.165        | 2.570                                 | 4.024 | 0.247 |
| <i>OASL</i>   | 0.024                              | 0.015 | <b>0.019</b> | 0.708                                 | 1.333 | 0.123        | 4.910                                 | 6.615 | 0.190 |
| <i>PLSCR1</i> | 0.015                              | 0.007 | 0.052        | 0.715                                 | 1.173 | 0.143        | 2.615                                 | 2.247 | 0.796 |
| <i>SP110</i>  | 0.090                              | 0.067 | 0.063        | 0.987                                 | 1.468 | 0.089        | 1.895                                 | 1.795 | 0.481 |
| <i>STAT1</i>  | 0.473                              | 0.293 | <b>0.019</b> | 0.790                                 | 1.520 | <b>0.004</b> | 1.792                                 | 2.397 | 0.143 |
| <i>STAT2</i>  | 0.144                              | 0.098 | 0.063        | 0.871                                 | 1.192 | 0.218        | 1.529                                 | 1.647 | 0.631 |
| <i>TRIM5</i>  | 0.035                              | 0.023 | 0.075        | 1.131                                 | 1.341 | 0.853        | 1.295                                 | 1.959 | 0.481 |
| <i>TYK2</i>   | 0.055                              | 0.040 | 0.063        | 0.713                                 | 1.269 | 0.218        | 0.975                                 | 1.261 | 0.029 |

Expression values of selected interferon-stimulated genes. Baseline: higher values mean higher expression. Week 4 and 8 changes:  $2^{(-\Delta\Delta Ct)} > 1$  refers to upregulation at week 4 compared to baseline;  $2^{(-\Delta\Delta Ct)} < 1$  refers to downregulation at week 4 compared to baseline; similar interpretation for  $2^{(-\Delta\Delta Ct)}$  at week 8 compared to baseline.

None met the predetermined FDR at 10% using the Benjamini-Hochberg procedure for multiple tests.

Exact Wilcoxon test was used to detect significance between the two groups at baseline, week 4 induction and week 8 induction. Significant *p* values are shown in *bold*.
